**Effects of arm swing amplitude and lower limb asymmetry on motor variability patterns  
during treadmill gait**

Christopher A. Bailey <sup>a</sup>, Allen Hill <sup>a</sup>, Ryan Graham <sup>a</sup>, Julie Nantel <sup>a\*</sup>

<sup>a</sup> School of Human Kinetics, University of Ottawa, Ottawa, Canada

\* corresponding author, [jnantel@uottawa.ca](mailto:jnantel@uottawa.ca)

1  
2  
3  
4  
5  
6  
7  
8  
9  
10  
11  
12  
13  
14  
15  
16  
17  
18  
19  
20  
21

## Abstract

Motor variability is a fundamental feature of gait. Altered arm swing and lower limb asymmetry (LLA) may be contributing factors having been shown to affect the magnitude and dynamics of variability in spatiotemporal and trunk motion. However, the effects on lower limb joints remain unclear.

Full-body kinematics of 15 healthy young adults were recorded during treadmill walking using the Computer-Assisted Rehabilitation Environment system. Participants completed six trials, combining three arm swing (AS) amplitude (normal, active, held) and two LLA (symmetrical, asymmetrical) conditions. The mean standard deviation (meanSD), maximum Lyapunov exponent ( $\lambda_{\max}$ ), detrended fluctuation analysis scaling exponent of range of motion (DFA $\alpha$ ), and sample entropy (SaEn) were computed for tridimensional trunk, pelvis, and lower limb joint angles, and compared using repeated-measures ANOVAs.

Relative to normal AS, active AS increased meanSD of all joint angles,  $\lambda_{\max}$  of frontal plane hip and ankle angles, and SaEn of sagittal plane ankle angles. Active AS, however, did not affect  $\lambda_{\max}$  or SaEn of trunk or pelvis angles. LLA increased meanSD of sagittal plane joint angles,  $\lambda_{\max}$  of Euclidean norm trunk angle and of lower limb joint angles, and SaEn of ankle dorsiflexion/plantarflexion, but decreased SaEn of tridimensional trunk angles and hip rotation in the slower moving leg.

Alterations in lower limb variability with active AS and LLA suggest that young adults actively exploit their lower limb redundancies to maintain gait. This appears to preserve trunk stability and regularity during active AS but not during LLA.

22

## 1. Introduction

23           Motor variability in gait, the natural biological variability from stride to stride in motor  
24 outputs like movement time and kinematics (Newell and Slifkin, 1998), changes with older age  
25 (Beauchet et al., 2017; Buzzi et al., 2003; Kang and Dingwell, 2009; Kurz and Stergiou, 2003).  
26 Measurable features of motor variability beyond magnitude include dynamical stability (e.g.  
27 maximum Lyapunov exponent measuring local dynamic stability), persistence (e.g. scaling  
28 exponent from detrended fluctuation analysis), and regularity (e.g. sample entropy). For these  
29 features, older adults are reported to have lower local dynamic stability of the trunk and lower  
30 limb (Buzzi et al., 2003; Kang and Dingwell, 2009), no difference in persistence of fluctuations  
31 in stride length, time, or speed (Dingwell et al., 2017), and lower regularity of the knee and hip  
32 kinematics in the sagittal plane (Kurz and Stergiou, 2003). Furthermore, older adults who  
33 possess high motor variability have been shown to be more likely to fall (Callisaya et al., 2011;  
34 Hausdorff et al., 2001; Toebe et al., 2012), although some variability is beneficial since having  
35 too little can also leads to falls (Beauchet et al., 2009; Brach et al., 2005). These findings suggest  
36 that a loss of dynamic stability and regularity in kinematics could be a potential mechanism for  
37 incurring a fall during gait.

38           Prior studies indicate that older adults walk with smaller arm swing amplitude (Mirelman  
39 et al., 2015) and larger lower limb asymmetry (Aboutorabi et al., 2016) relative to young adults,  
40 meaning arm swing and lower limb asymmetry could be factors that contribute to motor  
41 variability. In young adults, actively increasing arm swing amplitude has been found to increase  
42 local dynamic stability of the trunk relative to normal arm swing (Hill and Nantel, 2019; Wu et  
43 al., 2016), increase the magnitude of variability in step time, length, and width (Hill and Nantel,  
44 2019; Siragy et al., 2020), but not affect variability of hip knee and ankle angles (Wu et al.,

45 2016). As discussed by Hill and Nantel (2019), active arm swing may stabilize the trunk by  
46 increasing angular momentum and its resistance to change or by increased attention to the  
47 movement of the torso and upper limbs. Loss of arm swing amplitude could then destabilize the  
48 trunk, however, studies of steady-state gait with restricted arm swing saw no such effect (Bruijn  
49 et al., 2010; Hill and Nantel, 2019). As for lower limb asymmetry, studies have shown in young  
50 adults that split-belt treadmill induced asymmetry decreases margin of stability (Buurke et al.,  
51 2018; Darter et al., 2018), decreases local dynamic stability of the trunk (Hill and Nantel, 2019),  
52 and increases magnitude of variability in step length (Hill and Nantel, 2019; Siragy et al., 2020).  
53 Since lower limb joint variations are likely responsible for spatiotemporal variability, it appears  
54 that exploitation of lower limb redundancy may not be sufficient to dynamically stabilize the  
55 trunk during asymmetric gait.

56 A key limitation presently in these investigations of arm swing amplitude and lower limb  
57 asymmetry is that motor variability has mainly been measured by spatiotemporal and trunk  
58 features and not across the full kinematic chain. To our knowledge, only Wu et al. (2016)  
59 investigated the influence of one of these factors on variability of lower limb joints in healthy  
60 young adults, finding no differences between active and normal arm swing. However, mean gait  
61 speed was relatively slow in their study (0.74-0.82 m/s) and increased with active arm swing,  
62 meaning gait speed influences on stride-to-stride variability (Dingwell and Marin, 2006) could  
63 have influenced their findings. Further exploration of the concurrent trunk, pelvis, and lower  
64 limb variability adjustments in young adults could help better understand how motor variability  
65 in gait emerges in older adults. Thus, we investigated in this study: 1) how arm swing amplitude  
66 and lower limb asymmetry alter variability of trunk, pelvis, and lower limb joint angles in gait  
67 and 2) if arm swing amplitude influences changes in variability of joint angles attributed to lower

68 limb asymmetry. We hypothesized that variability of lower limb joint angles would not change  
69 with active arm swing, that magnitude of variability would increase and local dynamic stability  
70 would decrease with lower limb asymmetry, and that there would be no interactions between  
71 active arm swing and lower limb asymmetry.

## 72 **2. Methods**

### 73 **2.1 Participants**

74 Fifteen healthy young adults (8 males;  $23.4 \pm 2.8$  years;  $72.3 \pm 13.5$  kg;  $1.70 \pm 0.08$  m)  
75 were recruited as a convenience sample from the Ottawa area as part of Hill and Nantel (2019).  
76 Participants were excluded if they had a musculoskeletal injury in the preceding six months, or  
77 any chronic neurological or orthopaedic disorders. Participants self-reported as right-hand  
78 dominant except for one participant who self-reported as ambidextrous. Each participants  
79 provided written informed consent, which followed the Declaration of Helsinki and was  
80 approved by the Ottawa Health Science Network Research Ethics Board (20170291-01H) and by  
81 the University of Ottawa Research Ethics Board (A06-17-03).

### 82 **2.2 Procedure**

83 Each participant completed gait trials in the Computer Assisted Rehabilitation  
84 Environment (CAREN) (CAREN-Extended, Motekforce Link, Amsterdam, NL). This combined  
85 a split-belt treadmill (TM-09-P-MOTEK, Motekforce Link, Amsterdam, NL) instrumented with  
86 a force plate (sampled at 1000 Hz; Bertec Corp., Columbus, OH) and a 12-camera optoelectronic  
87 motion capture system (sampled at 100 Hz; MX T20S, Vicon, Oxford, UK). Markers were  
88 positioned on the full body as described previously (Collins et al., 2009; Wilken et al., 2012). For  
89 each trial, the participant walked at 1.2 m/s for 200 seconds under one of three arm swing

90 conditions (normal, held, active) and one of two symmetry conditions (symmetric, asymmetric).  
91 For held arm swing, the participant was instructed to “hold [their] arms still along [their] sides  
92 without shoulder tension and arm stiffness”. For active arm swing, the participant was instructed  
93 to “swing [their] arms forward to be horizontal at peak forward swing”. For asymmetrical gait,  
94 the participant walked at 0.96 m/s with their right leg while walking at 1.2 m/s with their left leg  
95 (0.8:1 ratio). Conditions were randomized and the participant completed one trial for each  
96 combination of arm swing and symmetry conditions.

### 97 **2.3 Data analysis**

98 Marker trajectories were low-pass filtered (10 Hz, Butterworth, zero-lag, 4<sup>th</sup> order) and  
99 used to model tridimensional trunk (flexion, bending, rotation), pelvis (tilt, obliquity, rotation),  
100 hip (flexion, abduction, rotation), knee (flexion, valgus), and ankle (dorsiflexion, inversion)  
101 angles in Visual3D (C-Motion, Germantown, MD, USA) as previously described (Collins et al.,  
102 2009; Wilken et al., 2012). Trunk and pelvis angles were modeled relative to the global  
103 coordinate system. Ground reaction force data were low-pass filtered (20 Hz, Butterworth, zero-  
104 lag, 4<sup>th</sup> order) and combined with selected kinematic features (foot position relative to pelvis,  
105 foot velocity relative to pelvis and the laboratory, foot acceleration, and knee angle) in a logistic  
106 classification model to identify heel strike events which defined the start and end of each stride;  
107 these events were manually inspected and corrected as needed.

108 Using MATLAB (R2020b, MathWorks Inc., Natick, MA, USA), the first 25 seconds of  
109 data in each trial were discarded to account for time needed for the participant to reach a steady-  
110 state, and joint angle variability outcomes (magnitude of variability, local dynamic stability,  
111 statistical persistence, regularity) were quantified for the subsequent 125 strides. For each degree  
112 of freedom, the magnitude of variability was quantified by the mean standard deviation

113 (meanSD), calculated by normalizing continuous series to 101 points (0-100%) per stride,  
114 finding the standard deviation between strides at each normalized point, then taking the mean  
115 value. Local dynamic stability was quantified by the maximum short-term finite-time Lyapunov  
116 exponent ( $\lambda_{\max}$ ) using the method of Rosenstein et al. (1993). Continuous series were normalized  
117 to 12500 points (100 per stride on average), then  $\lambda_{\max}$  was computed with 5 embedding  
118 dimensions at a lag of 10 points from 0-0.5 strides (50 points) (Buzzi et al., 2003; Wu et al.,  
119 2016).  $\lambda_{\max}$  measures the divergence of neighbouring trajectories with higher positive values  
120 indicative of higher divergence and lower local dynamic stability. Statistical persistence was  
121 quantified by the detrended fluctuation analysis scaling exponent (DFA $\alpha$ ) (Dingwell et al., 2017),  
122 calculated from 125 consecutive joint angle range of motion values. DFA $\alpha$  is non-negative and  
123 unitless, with values  $> 0.5$  indicative of persistence (a fluctuation is typically followed by a  
124 fluctuation in the same direction), values  $< 0.5$  indicative of anti-persistence (a fluctuation is  
125 typically followed by a fluctuation in the opposite direction), and values  $\sim 0.5$  indicative of no  
126 correlation between fluctuations. Regularity was quantified by the sample entropy (SaEn),  
127 computed with 2 embedding dimensions and a 0.15 tolerance distance (Costa et al., 2003). SaEn  
128 can be investigated at several different scales using a multiscale function; we selected a factor of  
129 4 which is believed to be approximately where entropy of physiological signals stabilizes during  
130 slow, normal, and fast walking speeds (Costa et al., 2003). SaEn is non-negative and unitless,  
131 with higher values indicative of lower regularity. In supplement, variability outcomes were also  
132 calculated from Euclidean norm angles for each joint and can be found in Supplementary Table 1.

## 133 **2.4 Statistical analysis**

134 Using SPSS (v27, IBM, Armonk, NY, USA), normality of joint angle variability  
135 outcomes was confirmed via Kolmogorov-Smirnoff tests. Repeated measures ANOVAs were

136 conducted on each outcome to test for within-subjects effects of Swing (normal, active, held) and  
137 Symmetry (symmetric, asymmetric), as well as Swing\*Symmetry interactions. For each  
138 ANOVA, sphericity was inspected and, when violated, Greenhouse-Geisser corrections were  
139 applied. We used the Benjamini-Hochberg procedure to control the false discovery rate due to  
140 multiple comparisons (Benjamini and Hochberg, 1995); at an *a priori* alpha of 0.050, the critical  
141 p-value was adjusted to 0.010 (240 p-values: 3 statistical effects \* 20 individual joint angles \* 4  
142 variability outcomes). Partial eta squared effect sizes ( $\eta^2$ ) were computed and small, medium,  
143 and large effect sizes were defined with thresholds of  $\eta^2 = 0.01$ ,  $\eta^2 = 0.06$ , and  $\eta^2 = 0.14$   
144 respectively (Cohen, 1977). Pairwise post-hoc comparisons were made at a critical p-value of  
145 0.010.

### 146 **3. Results**

#### 147 **3.1 meanSD, magnitude of variability (Table 1)**

148 There were no significant Swing\*Symmetry interactions on meanSD ( $p \geq 0.010$ ).

149 Significant effects of Swing were found on meanSD of all individual joint angles ( $p =$   
150  $0.001-0.006$ , specific effect sizes in Table 1). Post-hoc tests revealed that, relative to normal  
151 swing, meanSD of each joint angle increased during active swing ( $p < 0.010$ ) and that meanSD  
152 of left hip rotation increased when the arms were held ( $p = 0.009$ ).

153 Significant effects of Symmetry were found on meanSD of trunk bending ( $p = 0.001$ ,  $\eta^2 =$   
154  $0.647$ ), pelvis tilt ( $p = 0.001$ ,  $\eta^2 = 0.554$ ), right hip flexion ( $p < 0.001$ ,  $\eta^2 = 0.650$ ), right hip  
155 abduction ( $p = 0.001$ ,  $\eta^2 = 0.529$ ), right knee flexion ( $p < 0.001$ ,  $\eta^2 = 0.680$ ), right knee valgus ( $p$   
156  $< 0.001$ ,  $\eta^2 = 0.601$ ), right ankle dorsiflexion ( $p = 0.003$ ,  $\eta^2 = 0.469$ ), left hip flexion ( $p = 0.008$ ,  
157  $\eta^2 = 0.404$ ), left knee flexion ( $p = 0.001$ ,  $\eta^2 = 0.536$ ), and left ankle dorsiflexion ( $p = 0.004$ ,  $\eta^2 =$



158 0.465). For all significant effects, meanSD increased in asymmetric gait relative to symmetric  
159 gait, indicating increased magnitude of variability with gait asymmetry.

160 [insert Table 1 here]

### 161 **3.2 $\lambda_{\max}$ , local dynamic stability (Table 2)**

162 There were no significant Swing\*Symmetry interactions on  $\lambda_{\max}$  ( $p \geq 0.010$ ).

163 Swing effects on  $\lambda_{\max}$  were observed for right hip abduction ( $p = 0.002$ ,  $\eta^2 = 0.424$ ) and  
164 right ankle inversion ( $p < 0.001$ ,  $\eta^2 = 0.612$ ). Post-hoc comparisons revealed that, relative to  
165 normal swing,  $\lambda_{\max}$  increased during active swing ( $p < 0.010$ ) but did not change when the arms  
166 were held. Effects of Swing were also observed for right knee flexion ( $p = 0.007$ ,  $\eta^2 = 0.299$ ) and  
167 left knee flexion ( $p = 0.005$ ,  $\eta^2 = 0.314$ ), but these post-hoc comparisons with normal swing were  
168 not statistically significant ( $p \geq 0.010$ ).

169 Symmetry effects on  $\lambda_{\max}$  were observed for right hip flexion ( $p < 0.001$ ,  $\eta^2 = 0.835$ ),  
170 right hip abduction ( $p < 0.001$ ,  $\eta^2 = 0.739$ ), right knee flexion ( $p < 0.001$ ,  $\eta^2 = 0.713$ ), right knee  
171 valgus ( $p = 0.002$ ,  $\eta^2 = 0.511$ ), right ankle dorsiflexion ( $p = 0.009$ ,  $\eta^2 = 0.397$ ), left hip flexion ( $p$   
172  $< 0.001$ ,  $\eta^2 = 0.598$ ), and left ankle dorsiflexion ( $p = 0.006$ ,  $\eta^2 = 0.425$ ). In all cases,  $\lambda_{\max}$   
173 increased during asymmetric gait relative to symmetric gait, indicating decreased local dynamic  
174 stability with asymmetry. Trends for increased  $\lambda_{\max}$  of trunk flexion ( $p = 0.023$ ) and trunk  
175 bending ( $p = 0.030$ ) with asymmetry were supported by a significant increase in  $\lambda_{\max}$  of  
176 Euclidean norm trunk angle ( $p = 0.002$ ,  $\eta^2 = 0.502$ ) (Supplementary Table 1).

177 [insert Table 2 here]

### 178 **3.3 DFA $\alpha$ , statistical persistence (Table 3)**

179           There were no significant effects on DFA $\alpha$  of any joint angles ( $p \geq 0.010$ ). DFA $\alpha$  means  
180 in symmetric and asymmetric gait conditions were all  $> 0.500$ , with some means closer to 1.000  
181 than to 0.500 (trunk: 0.532-0.805, pelvis: 0.568-0.717, hips: 0.576-0.840, knees: 0.633-0.844,  
182 ankles: 0.587-0.698), indicating that range of motion fluctuations were persistent on average.

183 [insert Table 3 here]

### 184 **3.4 SaEn, regularity (Table 4)**

185           There were no significant Swing\*Symmetry interactions on SaEn ( $p \geq 0.010$ ).

186           Significant Swing effects showed that, compared to normal swing, active swing led to  
187 increased SaEn of right ankle dorsiflexion ( $p < 0.001$ ,  $\eta^2 = 0.703$ ) and left ankle dorsiflexion ( $p =$   
188  $0.007$ ,  $\eta^2 = 0.419$ ). No significant changes in SaEn were observed when the arm was held ( $p \geq$   
189  $0.010$ ).

190           Significant Symmetry effects showed that, compared to symmetric gait, asymmetric gait  
191 led to decreased SaEn of trunk flexion ( $p = 0.009$ ,  $\eta^2 = 0.397$ ), trunk bending ( $p < 0.001$ ,  $\eta^2 =$   
192  $0.704$ ), trunk rotation ( $p < 0.001$ ,  $\eta^2 = 0.653$ ), and right hip rotation ( $p = 0.001$ ,  $\eta^2 = 0.545$ ), and  
193 increased SaEn of left ankle dorsiflexion ( $p = 0.007$ ,  $\eta^2 = 0.419$ ).

194 [insert Table 4 here]

195           All significant effects reported in this study had a large effect size ( $\eta^2 \geq 0.14$ ).

## 196 **4. Discussion**

### 197 **4.1 Active arm swing altered variability of lower limb joint angles while preserving pelvis** 198 **and trunk stability and regularity**

199           In contrast with our hypothesis and the findings of Wu et al. (2016), active arm swing  
200 increased the magnitude of variability in tridimensional hip, knee, and ankle joint angles. This is  
201 more in line with the increased magnitude of variability in step time, step length, and step width  
202 reported in previous investigations of our sample (Hill and Nantel, 2019; Siragy et al., 2020).  
203 However, unlike in Hill & Nantel (2019) where local dynamic stability of trunk linear and  
204 angular velocities decreased with active arm swing, local dynamic stability of trunk angles did  
205 not significantly change. This difference may be attributed to the different state-space  
206 constructions (linear and angular velocities together vs. uniaxial angles) for calculation of the  
207 maximum finite-time Lyapunov exponent (Gates and Dingwell, 2009). There was a trend for  
208 trunk rotation angle ( $p = 0.039$ ) that was not significant after adjusting critical alpha for false  
209 discovery rate, so it is possible that a small or medium effect size may exist but went undetected.  
210 Yet, our findings and those of Hill and Nantel (2019) agree that trunk and pelvis stability are, at a  
211 minimum, preserved during active arm swing gait. The preservation of trunk and pelvis stability  
212 may be related to the more variable and dynamic base of support (Hill and Nantel, 2019), such  
213 that variability in the base of support would be dictated by variability in lower limb joint  
214 movements. In fact, local dynamic stability of the hip and ankle kinematics and regularity of the  
215 ankle kinematics decreased with active arm swing, indicating key alterations in the non-linear  
216 dynamics of lower limb joint movements; these may reflect the use of redundant movement  
217 patterns to preserve local trunk and pelvis stability during active arm swing.

218           Interestingly, influences of active arm swing on stride-to-stride lower limb dynamics  
219 were plane-specific, where joint angle stability decreased in the frontal plane (right hip abduction  
220 and ankle inversion) while regularity decreased only in the sagittal plane (right and left ankle  
221 dorsiflexion). This suggests that increased arm swing amplitude leads to stride-to-stride

222 adjustments that preserve dynamic stability of joint movements in the main plane of motion.  
223 Plane-dependent adjustments have also been seen in the magnitude of ankle angle variability as a  
224 function of old age, with lower variability in the sagittal plane but higher variability in the frontal  
225 plane with older age (Bailey et al., 2020). Arm swing amplitude may therefore have a role in the  
226 plane-dependent stride-to-stride control patterns emerging with old age.

227         Restricted (held) arm swing had little to no effect on variability of lower limb joint angles,  
228 in agreement with the lack of effect seen on the magnitude of variability and the local dynamic  
229 stability of the trunk seen previously in steady-state gait (Bruijn et al., 2010; Hill and Nantel,  
230 2019; Siragy et al., 2020). The only effect seen was an increase in the magnitude of variability of  
231 the left hip rotation. However, since this was not observed in the right hip and no other motor  
232 variability features were affected, this should be investigated in future studies by directly  
233 comparing the left and right sides. Restricted arm swing has been similarly found to have little  
234 effect on average gait kinematics, where Umberger (2008) reported similar hip, knee, and ankle  
235 joint angles in a gait cycle compared to regular arm swing (5.5-10.2% root mean square  
236 difference). As noted in that study, restricted arm swing was associated with different magnitude  
237 and shape of the free vertical moment at the foot, and of knee joint moment and power,  
238 suggesting that restricted arm swing has a greater influence on lower limb kinetics than  
239 kinematics during gait.

#### 240 **4.2 Arm swing amplitude did not influence asymmetry-related changes in lower limb** 241 **variability patterns**

242         In agreement with our second hypothesis, we found no significant interactions between  
243 arm swing amplitude and lower limb asymmetry on motor variability of trunk, pelvis, and lower  
244 limb joint angles. Independent of arm swing amplitude, lower limb asymmetry had a significant

245 influence on motor variability of trunk, pelvis, and lower limb joint angles. Similar to trunk  
246 velocity (Hill and Nantel, 2019; Siragy et al., 2020), magnitude of variability increased for all  
247 joint angles and local dynamic stability decreased for Euclidean norm trunk angle and all lower  
248 limb joint angles. These lower limb adjustments were seen predominantly in sagittal plane  
249 degrees of freedom bilaterally. There was also statistical persistence in the range of motion  
250 fluctuations, and the regularity of right ankle dorsiflexion/plantarflexion decreased while  
251 regularity of all trunk angles and of the right hip rotation increased. Collectively, these findings  
252 suggest that individuals continually searched for motor strategies amongst their redundancy to  
253 perform asymmetric gait, particularly in the sagittal plane. Split-belt asymmetry adds a cognitive  
254 demand that, in agreement with McFadyen et al. (McFadyen et al., 2009), individuals seem to  
255 adjust to by coordinating gait timing through conscious attention to the redundancies of the lower  
256 extremity. Our findings provide two new insights into where this attention is specifically directed  
257 in the lower limbs. First, we saw more prevalent changes in magnitude of variability, local  
258 dynamic stability, and regularity in the right lower extremity (moving at the slower 0.96 m/s  
259 speed) suggesting that the attention to exploiting kinematic redundancies is more directed to the  
260 limb undergoing the change in speed; however, this study was not powered to also explore right-  
261 left differences and this needs to be confirmed statistically in future work. Second, we saw some  
262 changes at the hip and ankle that were not observed at the knee, suggesting that attention is  
263 directed more to joints with larger kinematic redundancies. Of note, these observations were at a  
264 lower asymmetry ratio (0.8:1) relative to the 1:2 ratio often employed in split-belt gait  
265 assessments (Hirata et al., 2019; McFadyen et al., 2009), indicating that even minor asymmetries  
266 can alter lower limb motor variability in healthy young adults. Our findings could be amplified in  
267 older adults, as healthy males and females aged  $73.4 \pm 4.7$  years adapted less and more slowly to

268 asymmetric gait induced by a split-belt treadmill than young adults (Bruijn et al., 2012). With  
269 healthy older age also associated with changes in gait asymmetry overground (Aboutorabi et al.,  
270 2016) and altered magnitude of variability in lower limb joint angles and muscle activation  
271 amplitude (Bailey et al., 2019, 2020), asymmetry may be a potential mechanism contributing to  
272 age-related adjustments in motor variability during gait.

### 273 **4.3 Limitations**

274 Findings are from young adults walking on a treadmill at 1.2 m/s; influences of arm  
275 swing and asymmetry on joint angle variability patterns may differ for older adults and different  
276 gait conditions. For instance, the treadmill gait produces lower variability of stride time  
277 (Hollman et al., 2016) and joint angles (Dingwell et al., 2001) relative to overground gait, which  
278 could mean that the reported adjustments related to arm swing and lower limb were also smaller  
279 in magnitude than those occurring overground. Since arm swing amplitude was manipulated by  
280 artificial conditions that maintained swing cadence but decreased interlimb coordination (Hill  
281 and Nantel, 2019), future investigations may wish to explore effects of more natural variations in  
282 arm swing amplitude between individuals using a correlation approach. Finally, males and  
283 females were grouped together for sufficient statistical power; given evidence of some  
284 differences in motor variability patterns of males and females during gait (Bailey et al., 2019,  
285 2020), further work is needed to examine how sex influences arm swing and asymmetry-related  
286 adjustments in motor variability.

### 287 **4.4 Conclusion**

288 Active arm swing increased the magnitude of variability in joint angles across all planes,  
289 and, while preserving local dynamic stability and regularity of trunk and pelvis angles, decreased

290 lower limb joint angle local dynamic stability in the frontal and transverse planes and regularity  
291 in the sagittal plane. Lower limb asymmetry increased the magnitude of variability of all joint  
292 angles and decreased the local dynamic stability of Euclidean norm trunk angle and lower limb  
293 joint angles, and decreased the regularity of right ankle dorsiflexion/plantarflexion while  
294 increasing regularity of all trunk angles. We conclude that young adults actively search for motor  
295 strategies amongst the redundancies of their ankle, knee, hip when actively swinging their arm  
296 and when walking asymmetrically, preserving stability and regularity of the pelvis and trunk  
297 during active arm swing but not during lower limb asymmetry. Findings may help explain arm  
298 swing amplitude and motor variability adjustments observed in gait of older adults but require  
299 confirmation in this population.

### 300 **Funding**

301 This work was supported by grants from the Natural Sciences and Engineering Research  
302 Council of Canada (RGPAS 493045-2016 and RGPIN-2016-04928), by the Ontario Ministry of  
303 Research, Innovation and Science Early Researcher Award (ER16-12-206), and by a  
304 postdoctoral fellowship from the uOttawa-Children's Hospital of Eastern Ontario Research  
305 Institute.

### 306 **Conflict of Interest Statement**

307 The authors declare no conflicts of interest. Funding sources had no involvement in study  
308 design, data collection, analysis, and interpretation, or writing of the manuscript.

### 309 **Acknowledgement**

310 The authors gratefully acknowledge Courtney Bridgewater for her assistance with data  
311 collection and the participants for their time.

312

## References

- 313 Aboutorabi, A., Arazpour, M., Bahramizadeh, M., Hutchins, S.W., Fadayevatan, R., 2016. The  
314 effect of aging on gait parameters in able-bodied older subjects: a literature review. *Aging*  
315 *Clin. Exp. Res.* 28, 393–405. <https://doi.org/10.1007/s40520-015-0420-6>
- 316 Bailey, C.A., Porta, M., Piloni, G., Arippa, F., Côté, J.N., Pau, M., 2020. Does variability in  
317 motor output at individual joints predict stride time variability in gait? Influences of age,  
318 sex, and plane of motion. *J. Biomech.* 99, 109574.  
319 <https://doi.org/10.1016/j.jbiomech.2019.109574>
- 320 Bailey, C.A., Porta, M., Piloni, G., Arippa, F., Pau, M., Côté, J.N., 2019. Sex-independent and  
321 dependent effects of older age on cycle-to-cycle variability of muscle activation during gait.  
322 *Exp. Gerontol.* 124, 110656. <https://doi.org/10.1016/j.exger.2019.110656>
- 323 Beauchet, O., Allali, G., Annweiler, C., Bridenbaugh, S., Assal, F., Kressig, R.W., Herrmann,  
324 F.R., 2009. Gait Variability among Healthy Adults: Low and High Stride-to-Stride  
325 Variability Are Both a Reflection of Gait Stability. *Gerontology* 55, 702–706.  
326 <https://doi.org/10.1159/000235905>
- 327 Beauchet, O., Allali, G., Sekhon, H., Verghese, J., Guilain, S., Steinmetz, J.-P., Kressig, R.W.,  
328 Barden, J.M., Szturm, T., Launay, C.P., Grenier, S., Bherer, L., Liu-Ambrose, T., Chester,  
329 V.L., Callisaya, M.L., Srikanth, V., Léonard, G., De Cock, A.-M., Sawa, R., Duque, G.,  
330 Camicioli, R., Helbostad, J.L., 2017. Guidelines for Assessment of Gait and Reference  
331 Values for Spatiotemporal Gait Parameters in Older Adults: The Biomathics and Canadian  
332 Gait Consortiums Initiative. *Front. Hum. Neurosci.* 11.  
333 <https://doi.org/10.3389/fnhum.2017.00353>



- 334 Benjamini, Y., Hochberg, Y., 1995. Controlling the False Discovery Rate: A Practical and  
335 Powerful Approach to Multiple Testing. *J. R. Stat. Soc. Ser. B* 57, 289–300.  
336 <https://doi.org/10.1111/j.2517-6161.1995.tb02031.x>
- 337 Brach, J.S., Berlin, J.E., VanSwearingen, J.M., Newman, A.B., Studenski, S.A., 2005. Too much  
338 or too little step width variability is associated with a fall history in older persons who walk  
339 at or near normal gait speed. *J. Neuroeng. Rehabil.* 2, 21. [https://doi.org/10.1186/1743-](https://doi.org/10.1186/1743-0003-2-21)  
340 [0003-2-21](https://doi.org/10.1186/1743-0003-2-21)
- 341 Bruijn, S.M., Meijer, O.G., Beek, P.J., van Dieen, J.H., 2010. The effects of arm swing on  
342 human gait stability. *J. Exp. Biol.* 213, 3945–3952. <https://doi.org/10.1242/jeb.045112>
- 343 Bruijn, S.M., Van Impe, A., Duysens, J., Swinnen, S.P., 2012. Split-belt walking: adaptation  
344 differences between young and older adults. *J. Neurophysiol.* 108, 1149–1157.  
345 <https://doi.org/10.1152/jn.00018.2012>
- 346 Buurke, T.J.W., Lamoth, C.J.C., Vervoort, D., van der Woude, L.H. V., den Otter, R., 2018.  
347 Adaptive control of dynamic balance in human gait on a split-belt treadmill. *J. Exp. Biol.*  
348 221, jeb174896. <https://doi.org/10.1242/jeb.174896>
- 349 Buzzi, U.H., Stergiou, N., Kurz, M.J., Hageman, P.A., Heidel, J., 2003. Nonlinear dynamics  
350 indicates aging affects variability during gait. *Clin. Biomech.* 18, 435–443.  
351 [https://doi.org/10.1016/S0268-0033\(03\)00029-9](https://doi.org/10.1016/S0268-0033(03)00029-9)
- 352 Callisaya, M.L., Blizzard, L., Schmidt, M.D., Martin, K.L., McGinley, J.L., Sanders, L.M.,  
353 Srikanth, V.K., 2011. Gait, gait variability and the risk of multiple incident falls in older  
354 people: a population-based study. *Age Ageing* 40, 481–487.  
355 <https://doi.org/10.1093/ageing/afr055>

- 356 Cohen, J., 1977. *Statistical Power Analysis for the Behavioral Sciences*. Elsevier.
- 357 <https://doi.org/10.1016/C2013-0-10517-X>
- 358 Collins, T.D., Ghoussayni, S.N., Ewins, D.J., Kent, J.A., 2009. A six degrees-of-freedom marker
- 359 set for gait analysis: Repeatability and comparison with a modified Helen Hayes set. *Gait*
- 360 *Posture* 30, 173–180. <https://doi.org/10.1016/j.gaitpost.2009.04.004>
- 361 Costa, M., Peng, C.-K., L. Goldberger, A., Hausdorff, J.M., 2003. Multiscale entropy analysis of
- 362 human gait dynamics. *Phys. A Stat. Mech. its Appl.* 330, 53–60.
- 363 <https://doi.org/10.1016/j.physa.2003.08.022>
- 364 Darter, B.J., Labrecque, B.A., Perera, R.A., 2018. Dynamic stability during split-belt walking
- 365 and the relationship with step length symmetry. *Gait Posture* 62, 86–91.
- 366 <https://doi.org/10.1016/j.gaitpost.2018.03.006>
- 367 Dingwell, J.B., Cusumano, J.P., Cavanagh, P.R., Sternad, D., 2001. Local Dynamic Stability
- 368 Versus Kinematic Variability of Continuous Overground and Treadmill Walking. *J.*
- 369 *Biomech. Eng.* 123, 27. <https://doi.org/10.1115/1.1336798>
- 370 Dingwell, J.B., Marin, L.C., 2006. Kinematic variability and local dynamic stability of upper
- 371 body motions when walking at different speeds. *J. Biomech.* 39, 444–452.
- 372 <https://doi.org/10.1016/j.jbiomech.2004.12.014>
- 373 Dingwell, J.B., Salinas, M.M., Cusumano, J.P., 2017. Increased gait variability may not imply
- 374 impaired stride-to-stride control of walking in healthy older adults. *Gait Posture* 55, 131–
- 375 137. <https://doi.org/10.1016/j.gaitpost.2017.03.018>
- 376 Gates, D.H., Dingwell, J.B., 2009. Comparison of different state space definitions for local

- 377 dynamic stability analyses. *J. Biomech.* 42, 1345–1349.  
378 <https://doi.org/10.1016/j.jbiomech.2009.03.015>
- 379 Hausdorff, J.M., Rios, D.A., Edelberg, H.K., 2001. Gait variability and fall risk in community-  
380 living older adults: A 1-year prospective study. *Arch. Phys. Med. Rehabil.* 82, 1050–1056.  
381 <https://doi.org/10.1053/apmr.2001.24893>
- 382 Hill, A., Nantel, J., 2019. The effects of arm swing amplitude and lower-limb asymmetry on gait  
383 stability. *PLoS One* 14, e0218644. <https://doi.org/10.1371/journal.pone.0218644>
- 384 Hirata, K., Kokubun, T., Miyazawa, T., Yokoyama, H., Kubota, K., Sonoo, M., Hanawa, H.,  
385 Kanemura, N., 2019. Contribution of Lower Limb Joint Movement in Adapting to Re-  
386 establish Step Length Symmetry During Split-Belt Treadmill Walking. *J. Med. Biol. Eng.*  
387 39, 693–701. <https://doi.org/10.1007/s40846-018-0456-0>
- 388 Hollman, J.H., Watkins, M.K., Imhoff, A.C., Braun, C.E., Akervik, K.A., Ness, D.K., 2016. A  
389 comparison of variability in spatiotemporal gait parameters between treadmill and  
390 overground walking conditions. *Gait Posture* 43, 204–209.  
391 <https://doi.org/10.1016/j.gaitpost.2015.09.024>
- 392 Kang, H.G., Dingwell, J.B., 2009. Dynamic stability of superior vs. inferior segments during  
393 walking in young and older adults. *Gait Posture* 30, 260–263.  
394 <https://doi.org/10.1016/j.gaitpost.2009.05.003>
- 395 Kurz, M.J., Stergiou, N., 2003. The aging humans neuromuscular system expresses less certainty  
396 for selecting joint kinematics during gait. *Neurosci. Lett.* 348, 155–158.  
397 [https://doi.org/10.1016/S0304-3940\(03\)00736-5](https://doi.org/10.1016/S0304-3940(03)00736-5)

- 398 McFadyen, B.J., Hegeman, J., Duysens, J., 2009. Dual task effects for asymmetric stepping on a  
399 split-belt treadmill. *Gait Posture* 30, 340–344.  
400 <https://doi.org/10.1016/j.gaitpost.2009.06.004>
- 401 Mirelman, A., Bernad-Elazari, H., Nobel, T., Thaler, A., Peruzzi, A., Plotnik, M., Giladi, N.,  
402 Hausdorff, J.M., 2015. Effects of Aging on Arm Swing during Gait: The Role of Gait Speed  
403 and Dual Tasking. *PLoS One* 10, e0136043. <https://doi.org/10.1371/journal.pone.0136043>
- 404 Newell, K.M., Slifkin, A.B., 1998. The nature of movement variability, in: *Motor Behavior and*  
405 *Human Skill: A Multidisciplinary Perspective*. pp. 143–160.
- 406 Rosenstein, M.T., Collins, J.J., De Luca, C.J., 1993. A practical method for calculating largest  
407 Lyapunov exponents from small data sets. *Phys. D Nonlinear Phenom.* 65, 117–134.  
408 [https://doi.org/10.1016/0167-2789\(93\)90009-P](https://doi.org/10.1016/0167-2789(93)90009-P)
- 409 Siragy, T., Mezher, C., Hill, A., Nantel, J., 2020. Active arm swing and asymmetric walking  
410 leads to increased variability in trunk kinematics in young adults. *J. Biomech.* 99, 109529.  
411 <https://doi.org/10.1016/j.jbiomech.2019.109529>
- 412 Toebe, M.J.P., Hoozemans, M.J.M., Furrer, R., Dekker, J., van Dieën, J.H., 2012. Local  
413 dynamic stability and variability of gait are associated with fall history in elderly subjects.  
414 *Gait Posture* 36, 527–531. <https://doi.org/10.1016/j.gaitpost.2012.05.016>
- 415 Umberger, B.R., 2008. Effects of suppressing arm swing on kinematics, kinetics, and energetics  
416 of human walking. *J. Biomech.* 41, 2575–2580.  
417 <https://doi.org/10.1016/j.jbiomech.2008.05.024>
- 418 Wilken, J.M., Rodriguez, K.M., Brawner, M., Darter, B.J., 2012. Reliability and minimal

419 detectible change values for gait kinematics and kinetics in healthy adults. *Gait Posture* 35,  
420 301–307. <https://doi.org/10.1016/j.gaitpost.2011.09.105>

421 Wu, Y., Li, Y., Liu, A.-M., Xiao, F., Wang, Y.-Z., Hu, F., Chen, J.-L., Dai, K.-R., Gu, D.-Y.,  
422 2016. Effect of active arm swing to local dynamic stability during walking. *Hum. Mov. Sci.*  
423 45, 102–109. <https://doi.org/10.1016/j.humov.2015.10.005>

424

## Figures and Tables

Table 1. Mean standard deviation (meanSD) of joint angles performed under six gait conditions varying by arm swing (normal, active, held) and symmetry (symmetric, asymmetric). Values are group means (inter-individual standard deviation). P-values of main and interaction effects are provided, with effect sizes ( $\eta^2$ ) for significant effects ( $p < 0.010$ ).

| Joint       | Degree of freedom      | Symmetric     |               |               | Asymmetric    |               |               | Swing                 | Symmetry              | Interaction |
|-------------|------------------------|---------------|---------------|---------------|---------------|---------------|---------------|-----------------------|-----------------------|-------------|
|             |                        | Normal        | Active        | Held          | Normal        | Active        | Held          |                       |                       |             |
| Right hip   | FE <sup>a*</sup>       | 1.130 (0.212) | 1.880 (0.592) | 1.252 (0.310) | 1.550 (0.495) | 1.947 (0.601) | 1.571 (0.339) | .002, $\eta^2=0.484$  | <.001, $\eta^2=0.650$ | .085        |
|             | AA <sup>a*</sup>       | 0.814 (0.123) | 1.239 (0.320) | 0.826 (0.137) | 0.955 (0.218) | 1.269 (0.320) | 0.930 (0.150) | <.001, $\eta^2=0.645$ | .001, $\eta^2=0.529$  | .224        |
|             | Rotation <sup>a</sup>  | 1.100 (0.177) | 1.661 (0.468) | 1.130 (0.173) | 1.203 (0.178) | 1.617 (0.396) | 1.253 (0.248) | <.001, $\eta^2=0.688$ | .084                  | .141        |
| Right knee  | FE <sup>a*</sup>       | 1.884 (0.423) | 2.773 (0.631) | 2.026 (0.498) | 2.565 (1.270) | 2.920 (0.711) | 2.457 (0.618) | .001, $\eta^2=0.392$  | <.001, $\eta^2=0.680$ | .246        |
|             | VV <sup>a*</sup>       | 0.661 (0.159) | 0.908 (0.264) | 0.655 (0.135) | 0.754 (0.212) | 0.900 (0.253) | 0.744 (0.188) | <.001, $\eta^2=0.580$ | <.001, $\eta^2=0.601$ | .260        |
| Right ankle | DfPf <sup>a*</sup>     | 1.525 (0.329) | 2.084 (0.405) | 1.588 (0.278) | 1.817 (0.333) | 2.192 (0.377) | 1.800 (0.333) | <.001, $\eta^2=0.631$ | .003, $\eta^2=0.469$  | .247        |
|             | InvEv <sup>a</sup>     | 1.083 (0.241) | 1.456 (0.323) | 1.182 (0.424) | 1.180 (0.301) | 1.457 (0.314) | 1.127 (0.265) | <.001, $\eta^2=0.601$ | .676                  | .186        |
| Left hip    | FE <sup>a*</sup>       | 1.142 (0.186) | 1.887 (0.706) | 1.249 (0.302) | 1.371 (0.241) | 1.983 (0.606) | 1.489 (0.342) | .002, $\eta^2=0.491$  | .008, $\eta^2=0.404$  | .362        |
|             | AA <sup>a</sup>        | 0.818 (0.126) | 1.239 (0.314) | 0.850 (0.150) | 0.930 (0.192) | 1.288 (0.377) | 0.965 (0.209) | <.001, $\eta^2=0.658$ | .021                  | .388        |
|             | Rotation <sup>ab</sup> | 1.113 (0.238) | 1.704 (0.490) | 1.161 (0.207) | 1.189 (0.240) | 1.638 (0.434) | 1.271 (0.268) | <.001, $\eta^2=0.703$ | .347                  | .130        |
| Left knee   | FE <sup>a*</sup>       | 1.859 (0.384) | 2.560 (0.669) | 1.966 (0.492) | 2.212 (0.393) | 2.735 (0.647) | 2.367 (0.657) | .001, $\eta^2=0.490$  | .001, $\eta^2=0.536$  | .328        |
|             | VV <sup>a</sup>        | 0.649 (0.101) | 0.883 (0.242) | 0.665 (0.080) | 0.693 (0.093) | 0.871 (0.205) | 0.729 (0.126) | .001, $\eta^2=0.537$  | .086                  | .286        |
| Left ankle  | DfPf <sup>a*</sup>     | 1.518 (0.265) | 2.053 (0.359) | 1.540 (0.238) | 1.776 (0.323) | 2.192 (0.482) | 1.807 (0.432) | <.001, $\eta^2=0.619$ | .004, $\eta^2=0.465$  | .306        |
|             | InvEv <sup>a</sup>     | 1.072 (0.162) | 1.451 (0.272) | 1.106 (0.199) | 1.107 (0.168) | 1.400 (0.263) | 1.082 (0.198) | <.001, $\eta^2=0.730$ | .552                  | .270        |
| Pelvis      | Tilt <sup>a*</sup>     | 0.788 (0.119) | 1.188 (0.407) | 0.835 (0.159) | 0.936 (0.178) | 1.242 (0.394) | 0.997 (0.157) | .006, $\eta^2=0.415$  | .001, $\eta^2=0.554$  | .225        |
|             | Obliquity <sup>a</sup> | 0.778 (0.344) | 1.287 (0.911) | 0.826 (0.377) | 0.916 (0.454) | 1.269 (0.548) | 0.902 (0.352) | .001, $\eta^2=0.517$  | .109                  | .444        |
|             | Rotation <sup>a</sup>  | 1.174 (0.316) | 2.064 (0.948) | 1.185 (0.287) | 1.292 (0.321) | 2.199 (1.247) | 1.301 (0.370) | <.001, $\eta^2=0.580$ | .183                  | .997        |
| Trunk       | FE <sup>a</sup>        | 0.979 (0.250) | 1.417 (0.385) | 1.058 (0.274) | 1.142 (0.197) | 1.560 (0.683) | 1.131 (0.255) | .002, $\eta^2=0.469$  | .015                  | .670        |
|             | Bending <sup>a*</sup>  | 0.834 (0.189) | 1.350 (0.383) | 0.787 (0.176) | 1.028 (0.299) | 1.537 (0.586) | 0.993 (0.302) | <.001, $\eta^2=0.580$ | .001, $\eta^2=0.647$  | .970        |
|             | Rotation <sup>a</sup>  | 1.339 (0.382) | 3.470 (2.612) | 1.352 (0.318) | 1.521 (0.350) | 3.494 (2.461) | 1.478 (0.404) | .001, $\eta^2=0.552$  | .646                  | .866        |

FE: flexion/extension, AA: abduction/adduction, VV: valgus/varus, DfPf : dorsiflexion/plantarflexion, InvEv: inversion/eversion

<sup>a</sup> post-hoc difference between normal and active swing, <sup>b</sup> post-hoc difference between normal and held swing, \* symmetry difference

Table 2. Maximum short-term finite-time Lyapunov exponents ( $\lambda_{\max}$ ) of joint angles performed under six gait conditions varying by arm swing (normal, active, held) and symmetry (symmetric, asymmetric). Values are group means (inter-individual standard deviation). P-values of main and interaction effects are provided, with effect sizes ( $\eta^2$ ) for significant effects ( $p < 0.010$ ).

| Joint       | Degree of freedom  | Symmetric     |               |               | Asymmetric    |               |               | Swing                 | Symmetry              | Interaction |
|-------------|--------------------|---------------|---------------|---------------|---------------|---------------|---------------|-----------------------|-----------------------|-------------|
|             |                    | Normal        | Active        | Held          | Normal        | Active        | Held          |                       |                       |             |
| Right hip   | FE <sup>*</sup>    | 2.501 (0.190) | 2.606 (0.220) | 2.579 (0.231) | 2.720 (0.202) | 2.752 (0.197) | 2.762 (0.209) | .142                  | <.001, $\eta^2=0.835$ | .435        |
|             | AA <sup>a*</sup>   | 1.857 (0.107) | 1.975 (0.143) | 1.886 (0.128) | 1.946 (0.128) | 2.042 (0.150) | 1.983 (0.153) | .002, $\eta^2=0.424$  | <.001, $\eta^2=0.739$ | .782        |
|             | Rotation           | 1.580 (0.158) | 1.627 (0.159) | 1.582 (0.135) | 1.643 (0.144) | 1.664 (0.166) | 1.652 (0.172) | .227                  | .014                  | .620        |
| Right knee  | FE <sup>*</sup>    | 2.667 (0.191) | 2.657 (0.207) | 2.716 (0.165) | 2.835 (0.164) | 2.748 (0.116) | 2.886 (0.206) | .007, $\eta^2=0.299$  | <.001, $\eta^2=0.713$ | .255        |
|             | VV <sup>*</sup>    | 1.576 (0.204) | 1.620 (0.227) | 1.575 (0.130) | 1.666 (0.200) | 1.623 (0.172) | 1.698 (0.193) | .852                  | .002, $\eta^2=0.511$  | .017        |
| Right ankle | DfPf <sup>*</sup>  | 2.095 (0.134) | 2.176 (0.128) | 2.113 (0.126) | 2.160 (0.101) | 2.165 (0.086) | 2.212 (0.121) | .217                  | .009, $\eta^2=0.397$  | .047        |
|             | InvEv <sup>a</sup> | 1.558 (0.158) | 1.692 (0.130) | 1.584 (0.153) | 1.611 (0.147) | 1.772 (0.142) | 1.611 (0.130) | <.001, $\eta^2=0.612$ | .022                  | .276        |
| Left hip    | FE <sup>*</sup>    | 2.472 (0.166) | 2.604 (0.231) | 2.549 (0.211) | 2.639 (0.177) | 2.677 (0.200) | 2.673 (0.193) | .077                  | <.001, $\eta^2=0.598$ | .298        |
|             | AA                 | 1.901 (0.187) | 1.987 (0.188) | 1.914 (0.187) | 1.957 (0.154) | 2.025 (0.184) | 1.987 (0.213) | .054                  | .018                  | .589        |
|             | Rotation           | 1.556 (0.108) | 1.657 (0.162) | 1.562 (0.106) | 1.524 (0.108) | 1.605 (0.191) | 1.577 (0.119) | .026                  | .195                  | .046        |
| Left knee   | FE                 | 2.669 (0.199) | 2.646 (0.205) | 2.738 (0.175) | 2.742 (0.178) | 2.685 (0.115) | 2.778 (0.190) | .005, $\eta^2=0.314$  | .085                  | .817        |
|             | VV                 | 1.538 (0.199) | 1.541 (0.216) | 1.540 (0.183) | 1.523 (0.177) | 1.545 (0.180) | 1.594 (0.219) | .589                  | .563                  | .268        |
| Left ankle  | DfPf <sup>*</sup>  | 2.038 (0.134) | 2.096 (0.146) | 2.077 (0.132) | 2.107 (0.135) | 2.152 (0.154) | 2.157 (0.125) | .097                  | .006, $\eta^2=0.425$  | .849        |
|             | InvEv              | 1.620 (0.168) | 1.713 (0.126) | 1.642 (0.164) | 1.672 (0.178) | 1.726 (0.060) | 1.654 (0.156) | .025                  | .274                  | .395        |
| Pelvis      | Tilt               | 2.464 (0.127) | 2.466 (0.166) | 2.519 (0.201) | 2.500 (0.160) | 2.519 (0.206) | 2.566 (0.141) | .106                  | .023                  | .951        |
|             | Obliquity          | 2.215 (0.186) | 2.288 (0.273) | 2.239 (0.217) | 2.260 (0.171) | 2.322 (0.200) | 2.291 (0.177) | .142                  | .145                  | .913        |
|             | Rotation           | 2.348 (0.127) | 2.394 (0.159) | 2.360 (0.168) | 2.377 (0.129) | 2.450 (0.198) | 2.354 (0.203) | .112                  | .112                  | .684        |
| Trunk       | FE                 | 2.715 (0.150) | 2.692 (0.162) | 2.720 (0.144) | 2.715 (0.143) | 2.797 (0.138) | 2.780 (0.125) | .540                  | .023                  | .041        |
|             | Bending            | 2.941 (0.166) | 2.849 (0.208) | 2.904 (0.233) | 3.014 (0.210) | 2.893 (0.260) | 2.945 (0.171) | .107                  | .030                  | .842        |
|             | Rotation           | 2.656 (0.145) | 2.573 (0.208) | 2.688 (0.181) | 2.742 (0.174) | 2.617 (0.221) | 2.686 (0.147) | .039                  | .119                  | .582        |

FE: flexion/extension, AA: abduction/adduction, VV: valgus/varus, DfPf : dorsiflexion/plantarflexion, InvEv: inversion/eversion

<sup>a</sup> post-hoc difference between normal and active swing, <sup>b</sup> post-hoc difference between normal and held swing, <sup>\*</sup> symmetry difference

Table 3. DFA scaling exponent of range of motion (DFA $\alpha$ ) of joint angles performed under six gait conditions varying by arm swing (normal, active, held) and symmetry (symmetric, asymmetric). Values are group means (inter-individual standard deviation). P-values of main and interaction effects are provided, with effect sizes ( $\eta^2$ ) for significant effects ( $p < 0.010$ ).

| Joint       | Degree of freedom | Symmetric     |               |               | Asymmetric    |               |               | Swing | Symmetry | Interaction |
|-------------|-------------------|---------------|---------------|---------------|---------------|---------------|---------------|-------|----------|-------------|
|             |                   | Normal        | Active        | Held          | Normal        | Active        | Held          |       |          |             |
| Right hip   | FE                | 0.650 (0.174) | 0.822 (0.183) | 0.707 (0.223) | 0.744 (0.177) | 0.773 (0.227) | 0.708 (0.192) | .140  | .706     | .363        |
|             | AA                | 0.644 (0.136) | 0.645 (0.148) | 0.723 (0.198) | 0.676 (0.167) | 0.652 (0.174) | 0.674 (0.206) | .272  | .911     | .701        |
|             | Rotation          | 0.627 (0.120) | 0.621 (0.150) | 0.649 (0.150) | 0.635 (0.121) | 0.650 (0.180) | 0.586 (0.171) | .887  | .773     | .505        |
| Right knee  | FE                | 0.633 (0.162) | 0.725 (0.175) | 0.692 (0.097) | 0.721 (0.185) | 0.785 (0.166) | 0.766 (0.209) | .306  | .048     | .940        |
|             | VV                | 0.670 (0.163) | 0.679 (0.189) | 0.758 (0.139) | 0.712 (0.162) | 0.675 (0.189) | 0.728 (0.173) | .393  | .951     | .541        |
| Right ankle | DfPf              | 0.660 (0.194) | 0.664 (0.180) | 0.658 (0.185) | 0.658 (0.212) | 0.662 (0.213) | 0.664 (0.156) | .997  | .976     | .996        |
|             | InvEv             | 0.668 (0.134) | 0.636 (0.133) | 0.698 (0.149) | 0.630 (0.175) | 0.587 (0.163) | 0.595 (0.182) | .444  | .133     | .699        |
| Left hip    | FE                | 0.719 (0.168) | 0.768 (0.255) | 0.740 (0.159) | 0.682 (0.187) | 0.840 (0.237) | 0.710 (0.199) | .215  | .959     | .497        |
|             | AA                | 0.645 (0.183) | 0.630 (0.208) | 0.717 (0.211) | 0.669 (0.212) | 0.688 (0.173) | 0.661 (0.213) | .813  | .816     | .534        |
|             | Rotation          | 0.576 (0.153) | 0.549 (0.202) | 0.598 (0.196) | 0.629 (0.121) | 0.687 (0.183) | 0.607 (0.121) | .935  | .076     | .206        |
| Left knee   | FE                | 0.734 (0.209) | 0.748 (0.159) | 0.651 (0.163) | 0.703 (0.257) | 0.844 (0.205) | 0.776 (0.262) | .340  | .074     | .339        |
|             | VV                | 0.711 (0.193) | 0.669 (0.182) | 0.715 (0.205) | 0.782 (0.136) | 0.712 (0.251) | 0.699 (0.177) | .517  | .256     | .722        |
| Left ankle  | DfPf              | 0.693 (0.171) | 0.683 (0.186) | 0.641 (0.163) | 0.637 (0.203) | 0.599 (0.160) | 0.688 (0.204) | .827  | .427     | .230        |
|             | InvEv             | 0.633 (0.169) | 0.653 (0.224) | 0.632 (0.204) | 0.618 (0.161) | 0.615 (0.156) | 0.693 (0.169) | .781  | .935     | .377        |
| Pelvis      | Tilt              | 0.568 (0.140) | 0.714 (0.159) | 0.633 (0.229) | 0.585 (0.149) | 0.618 (0.156) | 0.606 (0.175) | .259  | .324     | .170        |
|             | Obliquity         | 0.611 (0.173) | 0.663 (0.172) | 0.697 (0.227) | 0.675 (0.246) | 0.664 (0.241) | 0.616 (0.219) | .946  | .894     | .364        |
|             | Rotation          | 0.672 (0.149) | 0.710 (0.204) | 0.749 (0.157) | 0.646 (0.174) | 0.717 (0.184) | 0.691 (0.139) | .404  | .410     | .721        |
| Trunk       | FE                | 0.532 (0.080) | 0.623 (0.209) | 0.574 (0.104) | 0.616 (0.159) | 0.621 (0.149) | 0.674 (0.133) | .408  | .043     | .174        |
|             | Bending           | 0.616 (0.098) | 0.646 (0.136) | 0.684 (0.198) | 0.650 (0.233) | 0.664 (0.206) | 0.605 (0.144) | .772  | .835     | .300        |
|             | Rotation          | 0.676 (0.121) | 0.805 (0.197) | 0.696 (0.209) | 0.617 (0.211) | 0.694 (0.170) | 0.623 (0.148) | .062  | .018     | .872        |

DFA: detrended fluctuation analysis, FE: flexion/extension, AA: abduction/adduction, VV: valgus/varus, DfPf : dorsiflexion/plantarflexion, InvEv: inversion/eversion

<sup>a</sup> post-hoc difference between normal and active swing, <sup>b</sup> post-hoc difference between normal and held swing, \* symmetry difference



Table 4. Sample entropy (SaEn) of joint angles performed under six gait conditions varying by arm swing (normal, active, held) and symmetry (symmetric, asymmetric). Values are group means (inter-individual standard deviation). P-values of main and interaction effects are provided, with effect sizes ( $\eta^2$ ) for significant effects ( $p < 0.010$ ).

| Joint       | Degree of freedom     | Symmetric     |               |               | Asymmetric    |               |               | Symmetry              | Swing                 | Interaction |
|-------------|-----------------------|---------------|---------------|---------------|---------------|---------------|---------------|-----------------------|-----------------------|-------------|
|             |                       | Normal        | Active        | Held          | Normal        | Active        | Held          |                       |                       |             |
| Right hip   | FE                    | 0.267 (0.048) | 0.286 (0.040) | 0.285 (0.045) | 0.277 (0.046) | 0.276 (0.041) | 0.288 (0.045) | .408                  | .907                  | .201        |
|             | AA                    | 0.703 (0.122) | 0.760 (0.175) | 0.772 (0.156) | 0.742 (0.143) | 0.731 (0.142) | 0.770 (0.174) | .088                  | .851                  | .107        |
|             | Rotation <sup>*</sup> | 1.201 (0.375) | 1.162 (0.224) | 1.268 (0.350) | 1.186 (0.368) | 1.080 (0.214) | 1.212 (0.350) | .160                  | .001, $\eta^2=0.545$  | .180        |
| Right knee  | FE                    | 0.358 (0.057) | 0.415 (0.094) | 0.363 (0.059) | 0.360 (0.077) | 0.400 (0.105) | 0.378 (0.070) | .032                  | .972                  | .267        |
|             | VV                    | 0.778 (0.231) | 0.802 (0.238) | 0.807 (0.236) | 0.802 (0.248) | 0.828 (0.249) | 0.791 (0.264) | .602                  | .663                  | .338        |
| Right ankle | DfPf <sup>a</sup>     | 0.498 (0.088) | 0.599 (0.073) | 0.507 (0.075) | 0.533 (0.078) | 0.607 (0.077) | 0.528 (0.079) | <.001, $\eta^2=0.703$ | .027                  | .433        |
|             | InvEv                 | 0.974 (0.290) | 0.956 (0.205) | 1.019 (0.273) | 0.966 (0.269) | 0.908 (0.213) | 0.959 (0.304) | .136                  | .194                  | .314        |
| Left hip    | FE                    | 0.261 (0.035) | 0.284 (0.045) | 0.278 (0.046) | 0.267 (0.045) | 0.289 (0.040) | 0.278 (0.046) | .038                  | .346                  | .947        |
|             | AA                    | 0.686 (0.070) | 0.779 (0.130) | 0.763 (0.110) | 0.753 (0.081) | 0.778 (0.152) | 0.772 (0.091) | .104                  | .028                  | .029        |
|             | Rotation              | 1.305 (0.224) | 1.235 (0.164) | 1.337 (0.286) | 1.369 (0.221) | 1.208 (0.164) | 1.369 (0.265) | .082                  | .251                  | .025        |
| Left knee   | FE                    | 0.338 (0.063) | 0.394 (0.084) | 0.370 (0.040) | 0.358 (0.065) | 0.386 (0.082) | 0.364 (0.058) | .094                  | .804                  | .320        |
|             | VV                    | 0.833 (0.259) | 0.866 (0.183) | 0.936 (0.317) | 0.817 (0.186) | 0.866 (0.232) | 0.864 (0.239) | .169                  | .345                  | .141        |
| Left ankle  | DfPf <sup>a*</sup>    | 0.518 (0.113) | 0.597 (0.089) | 0.526 (0.104) | 0.563 (0.096) | 0.606 (0.092) | 0.564 (0.109) | .001, $\eta^2=0.483$  | .007, $\eta^2=0.419$  | .130        |
|             | InvEv                 | 0.979 (0.225) | 1.004 (0.204) | 1.003 (0.235) | 1.007 (0.203) | 0.966 (0.199) | 1.013 (0.205) | .605                  | 1.000                 | .083        |
| Pelvis      | Tilt                  | 0.980 (0.116) | 0.968 (0.122) | 0.956 (0.104) | 0.941 (0.068) | 0.908 (0.088) | 0.925 (0.077) | .416                  | .051                  | .524        |
|             | Obliquity             | 0.932 (0.182) | 0.916 (0.166) | 0.970 (0.152) | 0.976 (0.167) | 0.910 (0.117) | 0.987 (0.148) | .223                  | .426                  | .251        |
|             | Rotation              | 0.807 (0.127) | 0.806 (0.145) | 0.841 (0.166) | 0.846 (0.161) | 0.821 (0.147) | 0.826 (0.142) | .774                  | .578                  | .420        |
| Trunk       | FE <sup>*</sup>       | 0.870 (0.134) | 0.883 (0.090) | 0.874 (0.108) | 0.830 (0.061) | 0.817 (0.094) | 0.825 (0.096) | 1.000                 | .009, $\eta^2=0.397$  | .683        |
|             | Bending <sup>*</sup>  | 0.780 (0.143) | 0.815 (0.116) | 0.794 (0.209) | 0.730 (0.164) | 0.741 (0.124) | 0.729 (0.176) | .770                  | <.001, $\eta^2=0.704$ | .695        |
|             | Rotation <sup>*</sup> | 0.748 (0.131) | 0.777 (0.153) | 0.766 (0.137) | 0.698 (0.094) | 0.693 (0.162) | 0.715 (0.106) | .818                  | <.001, $\eta^2=0.653$ | .597        |

FE: flexion/extension, AA: abduction/adduction, VV: valgus/varus, DfPf : dorsiflexion/plantarflexion, InvEv: inversion/eversion

<sup>a</sup> post-hoc difference between normal and active swing, <sup>b</sup> post-hoc difference between normal and held swing, \* symmetry difference

Supplementary Table 1. Motor variability of Euclidian mean joint angles in six gait conditions varying by arm swing (normal, active, held) and symmetry (symmetric, asymmetric). Metrics are mean standard deviation (meanSD), maximum short-term finite-time Lyapunov exponent ( $\lambda_{\max}$ ), detrended fluctuation analysis scaling exponent of range of motion (DFA $\alpha$ ), and sample entropy (SaEn). Values are group means (inter-individual standard deviation). P-values of main and interaction effects are provided, with effect sizes ( $\eta^2$ ) for significant effects ( $p < 0.010$ ).

| Motor variability metric | Joint                 | Symmetric     |               |               | Asymmetric    |               |               | Symmetry              | Swing                 | Interaction |
|--------------------------|-----------------------|---------------|---------------|---------------|---------------|---------------|---------------|-----------------------|-----------------------|-------------|
|                          |                       | Normal        | Active        | Held          | Normal        | Active        | Held          |                       |                       |             |
| meanSD                   | R Hip <sup>a*</sup>   | 1.112 (0.222) | 1.832 (0.569) | 1.153 (0.225) | 1.339 (0.270) | 1.830 (0.512) | 1.363 (0.276) | <.001, $\eta^2=0.676$ | .003, $\eta^2=0.490$  | .086        |
|                          | R Knee <sup>a*</sup>  | 1.273 (0.373) | 1.778 (0.568) | 1.304 (0.323) | 1.563 (0.546) | 1.835 (0.596) | 1.513 (0.452) | .001, $\eta^2=0.498$  | <.001, $\eta^2=0.724$ | .265        |
|                          | R Ankle <sup>a</sup>  | 1.516 (0.438) | 1.984 (0.544) | 1.579 (0.445) | 1.723 (0.437) | 2.033 (0.614) | 1.637 (0.477) | <.001, $\eta^2=0.638$ | .026                  | .113        |
|                          | L Hip <sup>ab</sup>   | 1.046 (0.175) | 1.586 (0.462) | 1.108 (0.183) | 1.151 (0.201) | 1.643 (0.491) | 1.253 (0.219) | <.001, $\eta^2=0.563$ | .014                  | .435        |
|                          | L Knee <sup>a</sup>   | 1.387 (0.300) | 1.990 (0.543) | 1.478 (0.406) | 1.624 (0.455) | 2.067 (0.488) | 1.715 (0.549) | <.001, $\eta^2=0.640$ | .013                  | .240        |
|                          | L Ankle <sup>a*</sup> | 1.790 (0.377) | 2.485 (0.583) | 1.788 (0.367) | 1.896 (0.470) | 2.396 (0.613) | 1.843 (0.485) | <.001, $\eta^2=0.742$ | <.001, $\eta^2=0.653$ | .050        |
|                          | Pelvis <sup>a</sup>   | 1.076 (0.242) | 1.860 (0.859) | 1.118 (0.261) | 1.225 (0.329) | 1.967 (0.816) | 1.212 (0.276) | <.001, $\eta^2=0.622$ | .082                  | .962        |
|                          | Trunk <sup>a</sup>    | 1.095 (0.324) | 2.326 (1.386) | 1.107 (0.271) | 1.279 (0.261) | 2.541 (1.598) | 1.221 (0.298) | <.001, $\eta^2=0.567$ | .265                  | .961        |
| $\lambda_{\max}$         | R Hip <sup>a*</sup>   | 1.964 (0.217) | 2.093 (0.236) | 2.000 (0.188) | 2.063 (0.210) | 2.148 (0.235) | 2.103 (0.211) | <.001, $\eta^2=0.419$ | <.001, $\eta^2=0.597$ | .383        |
|                          | R Knee                | 2.002 (0.205) | 2.053 (0.200) | 2.035 (0.196) | 2.214 (0.249) | 2.171 (0.207) | 2.217 (0.218) | .784                  | .012                  | .089        |
|                          | R Ankle               | 1.963 (0.159) | 2.031 (0.120) | 1.956 (0.135) | 1.964 (0.167) | 2.002 (0.129) | 1.970 (0.129) | .017                  | .819                  | .453        |
|                          | L Hip                 | 2.079 (0.169) | 2.197 (0.195) | 2.168 (0.196) | 2.159 (0.191) | 2.208 (0.222) | 2.211 (0.185) | .017                  | .030                  | .306        |
|                          | L Knee                | 2.003 (0.278) | 1.998 (0.260) | 2.040 (0.295) | 2.066 (0.256) | 2.059 (0.215) | 2.101 (0.230) | .291                  | .013                  | .999        |
|                          | L Ankle               | 1.920 (0.102) | 1.993 (0.192) | 1.915 (0.144) | 1.932 (0.122) | 1.965 (0.170) | 1.896 (0.128) | .006, $\eta^2=0.310$  | .607                  | .531        |
|                          | Pelvis                | 2.351 (0.162) | 2.419 (0.228) | 2.428 (0.199) | 2.431 (0.157) | 2.497 (0.242) | 2.450 (0.165) | .126                  | .050                  | .589        |
|                          | Trunk <sup>*</sup>    | 2.732 (0.114) | 2.739 (0.195) | 2.754 (0.162) | 2.853 (0.191) | 2.811 (0.233) | 2.840 (0.131) | .819                  | .002, $\eta^2=0.502$  | .730        |
| DFA $\alpha$             | R Hip                 | 0.638 (0.146) | 0.712 (0.146) | 0.627 (0.199) | 0.615 (0.169) | 0.715 (0.188) | 0.618 (0.204) | .187                  | .791                  | .938        |
|                          | R Knee                | 0.593 (0.124) | 0.724 (0.197) | 0.704 (0.188) | 0.639 (0.267) | 0.695 (0.194) | 0.704 (0.261) | .234                  | .913                  | .678        |
|                          | R Ankle               | 0.634 (0.184) | 0.696 (0.107) | 0.608 (0.186) | 0.557 (0.184) | 0.616 (0.225) | 0.596 (0.163) | .361                  | .215                  | .604        |
|                          | L Hip                 | 0.626 (0.131) | 0.816 (0.179) | 0.683 (0.137) | 0.651 (0.209) | 0.688 (0.230) | 0.675 (0.178) | .104                  | .238                  | .194        |

|      |                     |               |               |               |               |               |               |                      |                       |      |
|------|---------------------|---------------|---------------|---------------|---------------|---------------|---------------|----------------------|-----------------------|------|
|      | L Knee              | 0.650 (0.190) | 0.733 (0.200) | 0.632 (0.140) | 0.692 (0.248) | 0.797 (0.265) | 0.756 (0.177) | .141                 | .045                  | .792 |
|      | L Ankle             | 0.649 (0.129) | 0.621 (0.215) | 0.563 (0.160) | 0.599 (0.184) | 0.631 (0.172) | 0.579 (0.134) | .405                 | .787                  | .593 |
|      | Pelvis              | 0.599 (0.165) | 0.635 (0.234) | 0.677 (0.179) | 0.601 (0.156) | 0.661 (0.179) | 0.615 (0.136) | .651                 | .701                  | .425 |
|      | Trunk               | 0.677 (0.129) | 0.710 (0.200) | 0.650 (0.200) | 0.637 (0.202) | 0.716 (0.174) | 0.636 (0.157) | .317                 | .472                  | .906 |
| SaEn | R Hip *             | 0.514 (0.152) | 0.522 (0.159) | 0.526 (0.165) | 0.568 (0.161) | 0.537 (0.138) | 0.585 (0.180) | .272                 | .003, $\eta^2=0.475$  | .154 |
|      | R Knee              | 0.463 (0.079) | 0.492 (0.100) | 0.468 (0.091) | 0.455 (0.100) | 0.466 (0.102) | 0.475 (0.105) | .409                 | .435                  | .147 |
|      | R Ankle             | 0.793 (0.196) | 0.842 (0.144) | 0.816 (0.190) | 0.786 (0.156) | 0.832 (0.143) | 0.814 (0.181) | .069                 | .802                  | .953 |
|      | L Hip *             | 0.401 (0.049) | 0.457 (0.057) | 0.418 (0.076) | 0.440 (0.071) | 0.462 (0.063) | 0.442 (0.074) | .013                 | .008, $\eta^2=0.401$  | .157 |
|      | L Knee <sup>a</sup> | 0.474 (0.124) | 0.534 (0.129) | 0.482 (0.104) | 0.482 (0.082) | 0.546 (0.109) | 0.493 (0.103) | .001, $\eta^2=0.385$ | .481                  | .975 |
|      | L Ankle             | 0.782 (0.196) | 0.867 (0.130) | 0.792 (0.226) | 0.812 (0.178) | 0.855 (0.117) | 0.805 (0.207) | .013                 | .395                  | .199 |
|      | Pelvis              | 0.947 (0.132) | 0.893 (0.149) | 0.918 (0.138) | 0.980 (0.102) | 0.886 (0.110) | 0.940 (0.151) | .098                 | .646                  | .734 |
|      | Trunk *             | 0.766 (0.112) | 0.780 (0.133) | 0.761 (0.109) | 0.695 (0.113) | 0.691 (0.139) | 0.698 (0.081) | .971                 | <.001, $\eta^2=0.807$ | .731 |

<sup>a</sup> post-hoc difference between normal and active swing, <sup>b</sup> post-hoc difference between normal and held swing, \* symmetry difference
